# Supplementary material for: Guts of the Urban Ecosystem: Microbial Ecology of Sewer Infrastructure
Source: PubMed Central journal article supplement (PMC9426572; doi:10.1128/msystems.00118-22), 2022-06-28
Supplement: msystems.00118-22-sf003.pdf [file msystems.00118-22-sf003.pdf]

**a**

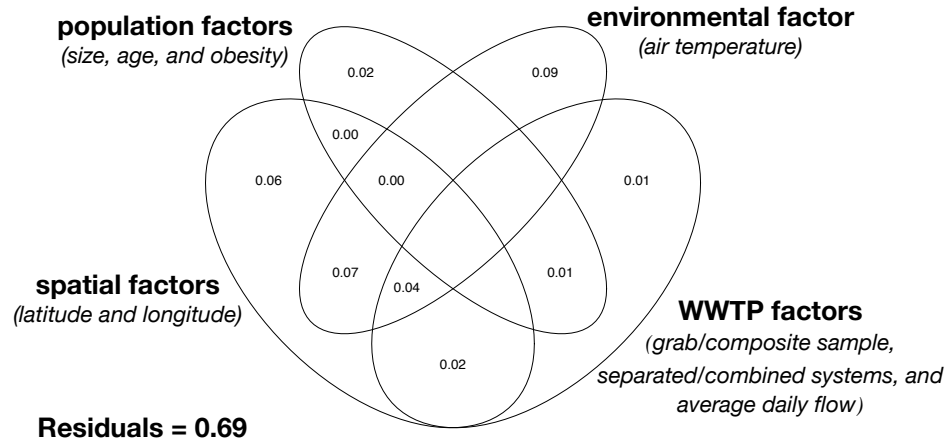

**b**

|                 | Degrees of freedom | Variance | F       | P-value (>F) |
|-----------------|--------------------|----------|---------|--------------|
| latitude        | 1                  | 0.021021 | 17.3023 | 0.001***     |
| longitude       | 1                  | 0.004253 | 3.5009  | 0.008**      |
| air temperature | 1                  | 0.027981 | 23.0313 | 0.001***     |
| Residual        | 180                | 0.218682 |         |              |
