# Supplementary material for: Guts of the Urban Ecosystem: Microbial Ecology of Sewer Infrastructure
Source: PubMed Central journal article supplement (PMC9426572; doi:10.1128/msystems.00118-22), 2022-06-28

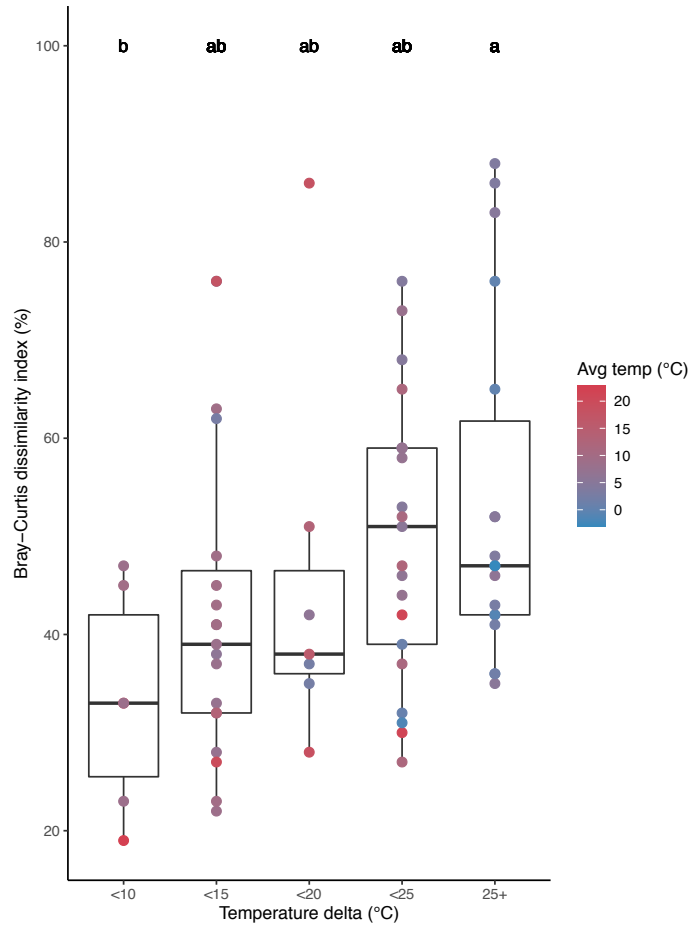

Supplement: msystems.00118-22-sf004.pdf [file msystems.00118-22-sf004.pdf]
