# Supplementary material for: Guts of the Urban Ecosystem: Microbial Ecology of Sewer Infrastructure
Source: PubMed Central journal article supplement (PMC9426572; doi:10.1128/msystems.00118-22), 2022-06-28
Supplement: msystems.00118-22-sf007.pdf [file msystems.00118-22-sf007.pdf]

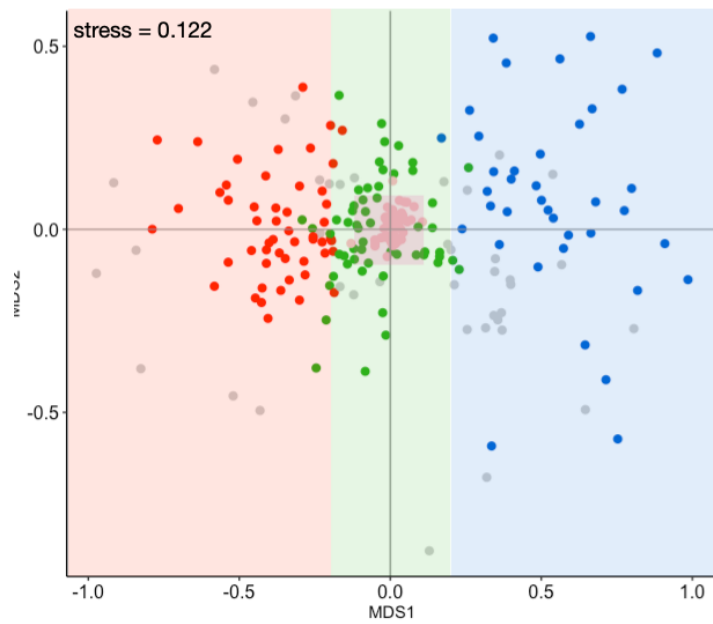

Temperature preferences based on  
Figure 3:

- NTP (LV)
- NTP (HV)
- HTP
- LTP
- oligotypes not assigned
